# Supplementary material for: Differences in Mucosal Gene Expression in the Colon of Two Inbred Mouse Strains after Colonization with Commensal Gut Bacteria
Source: PubMed Central journal article supplement (PMC3739790; doi:10.1371/journal.pone.0072317), 2013-08-09
Supplement: pone.0072317.s001.pdf [file pone.0072317.s001.pdf]

**Table S1: Similarity of the intestinal microbiota in the colonic lumen (A) and at the clonic mucosa (B)**

**A: Similarity of the microbiota in the colonic lumen of the experimental animals (%)**

|        | C3H_1  | C3H_2  | C3H_3  | C3H_4  | C3H_5  | C3H_6  | C3H_7  | C3H_8  | C3H_9  | C3H_10 | C3H_11 | C3H_12 | B10_1  | B10_2  | B10_3  | B10_4  | B10_5 | B10_6  | B10_7  | B10_8  | B10_9  | B10_10 | B10_11 | B10_12 |
|--------|--------|--------|--------|--------|--------|--------|--------|--------|--------|--------|--------|--------|--------|--------|--------|--------|-------|--------|--------|--------|--------|--------|--------|--------|
| C3H_1  | 100.00 |        |        |        |        |        |        |        |        |        |        |        |        |        |        |        |       |        |        |        |        |        |        |        |
| C3H_2  | 62.5   | 100.00 |        |        |        |        |        |        |        |        |        |        |        |        |        |        |       |        |        |        |        |        |        |        |
| C3H_3  | 66.67  | 63.64  | 100.00 |        |        |        |        |        |        |        |        |        |        |        |        |        |       |        |        |        |        |        |        |        |
| C3H_4  | 69.23  | 52.39  | 91.67  | 100.00 |        |        |        |        |        |        |        |        |        |        |        |        |       |        |        |        |        |        |        |        |
| C3H_5  | 75.47  | 65.12  | 81.63  | 76.60  | 100.00 |        |        |        |        |        |        |        |        |        |        |        |       |        |        |        |        |        |        |        |
| C3H_6  | 60.00  | 60.00  | 78.26  | 68.19  | 71.11  | 100.00 |        |        |        |        |        |        |        |        |        |        |       |        |        |        |        |        |        |        |
| C3H_7  | 55.32  | 75.68  | 69.77  | 58.54  | 76.19  | 66.67  | 100.00 |        |        |        |        |        |        |        |        |        |       |        |        |        |        |        |        |        |
| C3H_8  | 69.23  | 76.19  | 79.17  | 65.22  | 76.60  | 59.09  | 78.05  | 100.00 |        |        |        |        |        |        |        |        |       |        |        |        |        |        |        |        |
| C3H_9  | 61.54  | 57.15  | 62.5   | 60.87  | 63.83  | 68.19  | 53.66  | 60.87  | 100.00 |        |        |        |        |        |        |        |       |        |        |        |        |        |        |        |
| C3H_10 | 57.69  | 57.15  | 66.67  | 52.17  | 63.83  | 50.00  | 48.78  | 65.22  | 73.91  | 100.00 |        |        |        |        |        |        |       |        |        |        |        |        |        |        |
| C3H_11 | 50.00  | 52.63  | 72.73  | 66.67  | 55.81  | 70.00  | 54.06  | 61.91  | 66.67  | 66.67  | 100.00 |        |        |        |        |        |       |        |        |        |        |        |        |        |
| C3H_12 | 64.15  | 60.47  | 73.47  | 51.07  | 66.67  | 62.23  | 71.43  | 76.6   | 59.58  | 59.58  | 74.42  | 100.00 |        |        |        |        |       |        |        |        |        |        |        |        |
| B10_1  | 61.54  | 57.15  | 58.33  | 65.22  | 51.07  | 50.00  | 58.54  | 60.87  | 43.48  | 43.48  | 42.86  | 63.83  | 100.00 |        |        |        |       |        |        |        |        |        |        |        |
| B10_2  | 58.83  | 68.29  | 55.32  | 53.33  | 47.83  | 46.51  | 65.00  | 57.78  | 44.45  | 44.45  | 43.91  | 65.22  | 80.01  | 100.00 |        |        |       |        |        |        |        |        |        |        |
| B10_3  | 73.08  | 76.19  | 54.17  | 52.17  | 68.09  | 63.64  | 78.05  | 65.22  | 52.17  | 52.17  | 52.39  | 72.35  | 69.57  | 75.56  | 100.00 |        |       |        |        |        |        |        |        |        |
| B10_4  | 74.51  | 82.93  | 63.83  | 53.33  | 60.87  | 60.47  | 75.00  | 66.67  | 57.78  | 62.23  | 53.66  | 69.57  | 62.23  | 72.73  | 88.89  | 100.00 |       |        |        |        |        |        |        |        |
| B10_5  | 66.67  | 72.35  | 60.38  | 58.83  | 65.39  | 61.23  | 69.57  | 62.75  | 66.67  | 51.07  | 65.39  | 70.59  | 72.00  | 86.28  | 80.01  | 100.00 |       |        |        |        |        |        |        |        |
| B10_6  | 73.08  | 80.95  | 62.50  | 60.87  | 63.83  | 59.09  | 78.05  | 78.26  | 52.17  | 56.53  | 42.86  | 63.83  | 69.57  | 84.45  | 78.26  | 84.45  | 74.51 | 100.00 |        |        |        |        |        |        |
| B10_7  | 76.93  | 76.19  | 62.50  | 56.53  | 72.73  | 68.29  | 69.57  | 60.87  | 60.87  | 47.62  | 63.83  | 69.57  | 75.56  | 82.61  | 84.45  | 78.43  | 78.43 | 86.96  | 100.00 |        |        |        |        |        |
| B10_8  | 64.15  | 69.77  | 61.23  | 46.81  | 58.33  | 62.23  | 71.43  | 55.32  | 51.07  | 55.32  | 46.51  | 62.5   | 63.83  | 65.22  | 80.85  | 82.61  | 76.93 | 68.09  | 72.35  | 100.00 |        |        |        |        |
| B10_9  | 72.73  | 71.11  | 62.75  | 57.15  | 60.00  | 55.32  | 68.19  | 65.31  | 48.98  | 53.07  | 53.33  | 72.00  | 69.39  | 70.83  | 81.63  | 79.17  | 81.49 | 69.39  | 69.39  | 72.00  | 100.00 |        |        |        |
| B10_10 | 61.23  | 66.67  | 62.23  | 55.81  | 54.55  | 48.78  | 73.69  | 65.12  | 55.81  | 55.81  | 41.03  | 68.19  | 69.77  | 80.95  | 79.07  | 76.19  | 75.00 | 74.42  | 69.77  | 68.19  | 82.61  | 100.00 |        |        |
| B10_11 | 61.29  | 61.54  | 68.97  | 60.72  | 70.18  | 66.67  | 66.67  | 67.86  | 60.72  | 53.57  | 53.85  | 66.67  | 57.15  | 69.09  | 67.86  | 61.82  | 72.13 | 71.43  | 67.86  | 63.16  | 64.41  | 56.61  | 100.00 |        |
| B10_12 | 66.67  | 68.09  | 64.15  | 62.75  | 73.08  | 65.31  | 60.87  | 62.75  | 62.75  | 54.91  | 42.55  | 57.69  | 54.91  | 64.00  | 62.75  | 64.00  | 67.86 | 66.67  | 70.59  | 61.54  | 62.97  | 58.33  | 85.25  | 100.00 |

**B: Similarity of the microbiota at the colonic mucosa of the experimental animals (%)**

|        | C3H_1  | C3H_2  | C3H_3  | C3H_4  | C3H_5  | C3H_6  | C3H_7  | C3H_8  | C3H_9  | C3H_10 | C3H_11 | C3H_12 | B10_1  | B10_2  | B10_3  | B10_4  | B10_5  | B10_6 | B10_7  | B10_8  | B10_9  | B10_10 | B10_11 |  |
|--------|--------|--------|--------|--------|--------|--------|--------|--------|--------|--------|--------|--------|--------|--------|--------|--------|--------|-------|--------|--------|--------|--------|--------|--|
| C3H_1  | 100.00 |        |        |        |        |        |        |        |        |        |        |        |        |        |        |        |        |       |        |        |        |        |        |  |
| C3H_2  | 97.87  | 100.00 |        |        |        |        |        |        |        |        |        |        |        |        |        |        |        |       |        |        |        |        |        |  |
| C3H_3  | 66.67  | 68.01  | 100.00 |        |        |        |        |        |        |        |        |        |        |        |        |        |        |       |        |        |        |        |        |  |
| C3H_4  | 62.5   | 59.58  | 78.43  | 100.00 |        |        |        |        |        |        |        |        |        |        |        |        |        |       |        |        |        |        |        |  |
| C3H_5  | 75.47  | 69.23  | 82.15  | 79.25  | 100.00 |        |        |        |        |        |        |        |        |        |        |        |        |       |        |        |        |        |        |  |
| C3H_6  | 77.55  | 70.83  | 69.23  | 69.39  | 85.19  | 100.00 |        |        |        |        |        |        |        |        |        |        |        |       |        |        |        |        |        |  |
| C3H_7  | 74.51  | 64.00  | 70.37  | 66.67  | 82.15  | 73.08  | 100.00 |        |        |        |        |        |        |        |        |        |        |       |        |        |        |        |        |  |
| C3H_8  | 72.00  | 69.39  | 60.38  | 64.00  | 76.37  | 74.51  | 86.79  | 100.00 |        |        |        |        |        |        |        |        |        |       |        |        |        |        |        |  |
| C3H_9  | 65.31  | 66.67  | 61.54  | 69.39  | 77.78  | 68.01  | 80.77  | 74.51  | 100.00 |        |        |        |        |        |        |        |        |       |        |        |        |        |        |  |
| C3H_10 | 72.00  | 61.23  | 64.15  | 68.01  | 76.37  | 70.59  | 75.47  | 76.93  | 90.2   | 100.00 |        |        |        |        |        |        |        |       |        |        |        |        |        |  |
| C3H_11 | 74.51  | 76.00  | 70.37  | 62.75  | 71.43  | 69.23  | 77.78  | 71.7   | 73.08  | 83.02  | 100.00 |        |        |        |        |        |        |       |        |        |        |        |        |  |
| C3H_12 | 73.47  | 75.00  | 69.23  | 61.23  | 66.67  | 64.00  | 73.08  | 66.67  | 80.01  | 74.51  | 96.15  | 100.00 |        |        |        |        |        |       |        |        |        |        |        |  |
| B10_1  | 61.54  | 58.83  | 76.37  | 69.23  | 80.71  | 75.47  | 76.37  | 70.37  | 79.25  | 81.49  | 76.37  | 71.70  | 100.00 |        |        |        |        |       |        |        |        |        |        |  |
| B10_2  | 64.00  | 57.15  | 75.47  | 68.01  | 69.09  | 70.59  | 75.47  | 65.39  | 70.59  | 73.08  | 71.70  | 66.67  | 88.89  | 100.00 |        |        |        |       |        |        |        |        |        |  |
| B10_3  | 68.01  | 57.15  | 71.70  | 60.00  | 72.73  | 66.67  | 75.47  | 69.23  | 70.59  | 76.93  | 83.02  | 78.43  | 85.19  | 84.62  | 100.00 |        |        |       |        |        |        |        |        |  |
| B10_4  | 67.80  | 65.52  | 77.42  | 64.41  | 81.25  | 73.33  | 77.42  | 68.85  | 73.33  | 68.85  | 64.52  | 66.67  | 85.72  | 81.97  | 75.41  | 100.00 |        |       |        |        |        |        |        |  |
| B10_5  | 66.67  | 60.72  | 76.67  | 66.67  | 80.65  | 72.41  | 76.67  | 67.8   | 75.87  | 71.19  | 60.60  | 68.97  | 85.25  | 77.97  | 71.19  | 97.06  | 100.00 |       |        |        |        |        |        |  |
| B10_6  | 60.87  | 53.33  | 69.39  | 73.91  | 74.51  | 72.35  | 73.47  | 66.67  | 63.83  | 66.67  | 65.31  | 59.58  | 76.00  | 75.00  | 70.18  | 69.09  | 100.00 |       |        |        |        |        |        |  |
| B10_7  | 60.00  | 61.23  | 71.10  | 60.00  | 80.01  | 70.59  | 75.47  | 73.08  | 70.59  | 76.93  | 71.7   | 66.67  | 85.19  | 76.93  | 80.77  | 75.41  | 77.97  | 83.33 | 100.00 |        |        |        |        |  |
| B10_8  | 66.67  | 63.64  | 66.67  | 62.23  | 68.01  | 65.22  | 75.00  | 72.35  | 78.26  | 80.85  | 75.00  | 73.91  | 81.63  | 76.60  | 80.85  | 67.86  | 70.37  | 79.07 | 85.11  | 100.00 |        |        |        |  |
| B10_9  | 62.23  | 54.55  | 62.50  | 57.78  | 68.01  | 56.53  | 70.83  | 63.83  | 65.22  | 76.60  | 70.83  | 65.22  | 81.63  | 72.35  | 76.60  | 64.29  | 66.67  | 74.42 | 80.85  | 85.72  | 100.00 |        |        |  |
| B10_10 | 55.56  | 51.43  | 61.54  | 55.56  | 53.66  | 54.06  | 56.41  | 52.63  | 59.46  | 52.63  | 56.41  | 59.46  | 60.00  | 63.16  | 57.90  | 51.07  | 53.33  | 58.83 | 57.90  | 66.67  | 60.61  | 100.00 |        |  |
| B10_11 | 57.15  | 53.66  | 71.11  | 66.67  | 68.09  | 60.47  | 71.11  | 63.64  | 60.47  | 59.09  | 62.23  | 65.12  | 65.22  | 68.19  | 68.19  | 64.15  | 66.67  | 75.00 | 63.64  | 71.80  | 61.54  | 73.33  | 100.00 |  |
