# Supplementary material for: Differences in Mucosal Gene Expression in the Colon of Two Inbred Mouse Strains after Colonization with Commensal Gut Bacteria
Source: PubMed Central journal article supplement (PMC3739790; doi:10.1371/journal.pone.0072317), 2013-08-09
Supplement: pone.0072317.s002.pdf [file pone.0072317.s002.pdf]

**Table S2: Genes differentially expressed (fold change >2) between C57BL/10 and C3H mice**

| <b>Gene Symbol</b> | <b>Gene Name</b>                                              | <b>Fold change</b> | <b>FDR</b> | <b>Higher expressed in</b> |
|--------------------|---------------------------------------------------------------|--------------------|------------|----------------------------|
| Pla2g2a            | phospholipase A2, group IIA (platelets, synovial fluid)       | 70,80              | 1,62E-17   | C3H                        |
| Ang4               | angiogenin, ribonuclease A family, member 4                   | 33,06              | 2,23E-07   | C57BL/10                   |
| Nxpe5              | neurexophilin and PC-esterase domain family, member 5         | 33,03              | 3,84E-16   | C3H                        |
| Lin7c              | lin-7 homolog C (C. elegans)                                  | 32,64              | 3,84E-16   | C57BL/10                   |
| Nxpe4              | neurexophilin and PC-esterase domain family, member 4         | 30,51              | 1,43E-11   | C57BL/10                   |
| Slpi               | secretory leukocyte peptidase inhibitor                       | 28,44              | 5,23E-14   | C3H                        |
| Pla2g4c            | phospholipase A2, group IVC (cytosolic, calcium-independent)  | 23,41              | 8,76E-08   | C57BL/10                   |
| Qpct               | glutamyl-peptide cyclotransferase (glutamyl cyclase)          | 18,57              | 1,04E-18   | C3H                        |
| Gbp1               | guanylate binding protein 1                                   | 18,38              | 4,77E-16   | C3H                        |
| Plscr2             | phospholipid scramblase 2                                     | 16,62              | 3,11E-14   | C3H                        |
| Pnliprp2           | pancreatic lipase-related protein 2                           | 15,17              | 2,19E-08   | C57BL/10                   |
| Spna1              | spectrin alpha 1                                              | 13,64              | 2,93E-08   | C57BL/10                   |
| Rpgrip1            | retinitis pigmentosa GTPase regulator interacting protein 1   | 13,09              | 1,09E-15   | C57BL/10                   |
| Pdxdc1             | pyridoxal-dependent decarboxylase domain containing 1         | 12,12              | 1,04E-18   | C57BL/10                   |
| Fam199x            | family with sequence similarity 199, X-linked                 | 11,43              | 8,40E-18   | C57BL/10                   |
| Pcdh17             | protocadherin 17                                              | 11,37              | 4,98E-12   | C57BL/10                   |
| Lpo                | lactoperoxidase                                               | 11,25              | 1,04E-11   | C3H                        |
| Ppy                | pancreatic polypeptide                                        | 10,39              | 8,83E-11   | C3H                        |
| B4galnt2           | beta-1,4-N-acetyl-galactosaminyl transferase 2                | 9,31               | 2,85E-05   | C57BL/10                   |
| Apoc2              | apolipoprotein C-II                                           | 8,96               | 1,97E-11   | C3H                        |
| Abhd1              | abhydrolase domain containing 1                               | 8,87               | 1,71E-14   | C3H                        |
| Cbr3               | carbonyl reductase 3                                          | 8,45               | 4,98E-12   | C57BL/10                   |
| Trim30d            | tripartite motif-containing 30D                               | 8,14               | 1,09E-05   | C57BL/10                   |
| Mep1a              | meprin 1 alpha                                                | 7,77               | 8,16E-13   | C57BL/10                   |
| Trim34a            | tripartite motif-containing 34A                               | 7,19               | 5,52E-12   | C57BL/10                   |
| Mal                | myelin and lymphocyte protein, T cell differentiation protein | 7,13               | 6,05E-07   | C3H                        |
| Oasl2              | 2'-5' oligoadenylate synthetase-like 2                        | 6,67               | 6,68E-09   | C3H                        |
| Ifi202b            | interferon activated gene 202B                                | 6,51               | 3,13E-06   | C3H                        |
| Afm                | afamin                                                        | 6,47               | 2,07E-15   | C3H                        |
| Hddc3              | HD domain containing 3                                        | 6,46               | 4,25E-16   | C3H                        |
| Ceacam12           | carcinoembryonic antigen-related cell adhesion molecule 12    | 6,10               | 2,15E-04   | C57BL/10                   |
| Gsdmc4             | gasdermin C4                                                  | 5,76               | 7,44E-12   | C57BL/10                   |
| Rtp4               | receptor transporter protein 4                                | 5,64               | 1,40E-10   | C3H                        |
| BC064078           | cDNA sequence BC064078                                        | 5,64               | 1,42E-12   | C3H                        |

**Table S1 (continued): Genes differentially expressed (fold change >2) between C57BL/10 and C3H mice**

| <b>Gene Symbol</b> | <b>Gene Name</b>                                                                                      | <b>Fold change</b> | <b>FDR</b> | <b>Higher expressed in</b> |
|--------------------|-------------------------------------------------------------------------------------------------------|--------------------|------------|----------------------------|
| Ly6g6c             | lymphocyte antigen 6 complex, locus G6C                                                               | 5,46               | 2,71E-07   | C3H                        |
| Tff2               | trefoil factor 2 (spasmolytic protein 1)                                                              | 5,45               | 1,24E-04   | C3H                        |
| Amn                | amnionless                                                                                            | 5,44               | 4,76E-09   | C3H                        |
| P2ry6              | pyrimidinergic receptor P2Y, G-protein coupled, 6                                                     | 5,27               | 1,54E-12   | C57BL/10                   |
| Ifi2712a           | interferon, alpha-inducible protein 27 like 2A                                                        | 5,23               | 1,26E-05   | C3H                        |
| Msi2               | Musashi homolog 2 (Drosophila)                                                                        | 5,02               | 5,40E-11   | C57BL/10                   |
| Usp18              | ubiquitin specific peptidase 18                                                                       | 5,00               | 2,28E-07   | C3H                        |
| Tmem87a            | transmembrane protein 87A                                                                             | 4,69               | 4,64E-15   | C3H                        |
| 1810030J14Rik      | RIKEN cDNA 1810030J14 gene                                                                            | 4,66               | 7,66E-04   | C57BL/10                   |
| Ifit1              | interferon-induced protein with tetratricopeptide repeats 1                                           | 4,56               | 2,01E-04   | C3H                        |
| 2610305D13Rik      | RIKEN cDNA 2610305D13 gene                                                                            | 4,55               | 2,48E-13   | C3H                        |
| Myl7               | myosin, light polypeptide 7, regulatory                                                               | 4,40               | 5,84E-09   | C57BL/10                   |
| Tlr1               | toll-like receptor 1                                                                                  | 4,34               | 8,16E-13   | C57BL/10                   |
| Ifi44              | interferon-induced protein 44                                                                         | 4,34               | 1,05E-04   | C3H                        |
| Itln1              | intelectin 1 (galactofuranose binding)                                                                | 4,27               | 2,63E-02   | C57BL/10                   |
| 2210407C18Rik      | RIKEN cDNA 2210407C18 gene                                                                            | 4,21               | 4,00E-04   | C57BL/10                   |
| Gsdmc2             | gasdermin C2                                                                                          | 4,21               | 7,61E-11   | C57BL/10                   |
| Cd14               | CD14 antigen                                                                                          | 4,17               | 1,11E-10   | C3H                        |
| 2210010C17Rik      | RIKEN cDNA 2210010C17 gene                                                                            | 4,13               | 1,71E-14   | C3H                        |
| Ly6g               | lymphocyte antigen 6 complex, locus G                                                                 | 4,11               | 4,30E-03   | C3H                        |
| Fam73a             | family with sequence similarity 73, member A                                                          | 4,10               | 1,43E-12   | C57BL/10                   |
| Eno3               | enolase 3, beta muscle                                                                                | 4,05               | 1,44E-03   | C3H                        |
| Tns4               | tensin 4                                                                                              | 3,95               | 2,68E-08   | C57BL/10                   |
| Cnot7              | CCR4-NOT transcription complex, subunit 7                                                             | 3,83               | 9,00E-12   | C3H                        |
| Clps               | colipase, pancreatic                                                                                  | 3,79               | 2,07E-06   | C57BL/10                   |
| S100g              | S100 calcium binding protein G                                                                        | 3,67               | 1,54E-02   | C57BL/10                   |
| Cd74               | CD74 antigen (invariant polypeptide of major histocompatibility complex, class II antigen-associated) | 3,61               | 2,27E-07   | C3H                        |
| Gsdmcl-ps          | gasdermin C-like, pseudogene                                                                          | 3,56               | 3,19E-07   | C57BL/10                   |
| Ifit2              | interferon-induced protein with tetratricopeptide repeats 2                                           | 3,53               | 2,08E-07   | C3H                        |
| Dixdc1             | DIX domain containing 1                                                                               | 3,49               | 9,96E-05   | C57BL/10                   |
| Col8a1             | collagen, type VIII, alpha 1                                                                          | 3,46               | 5,90E-04   | C3H                        |
| Wars               | tryptophanyl-tRNA synthetase                                                                          | 3,45               | 6,06E-14   | C57BL/10                   |
| InsI5              | insulin-like 5                                                                                        | 3,44               | 1,74E-03   | C3H                        |
| Herc6              | hect domain and RLD 6                                                                                 | 3,41               | 2,31E-06   | C3H                        |

**Table S1 (continued): Genes differentially expressed (fold change >2) between C57BL/10 and C3H mice**

| <b>Gene Symbol</b> | <b>Gene Name</b>                                           | <b>Fold change</b> | <b>FDR</b> | <b>Higher expressed in</b> |
|--------------------|------------------------------------------------------------|--------------------|------------|----------------------------|
| D330028D13Rik      | RIKEN cDNA D330028D13 gene                                 | 3,40               | 1,04E-06   | C57BL/10                   |
| Isoc2b             | isochorismatase domain containing 2b                       | 3,36               | 1,95E-14   | C57BL/10                   |
| H2-BI              | histocompatibility 2, blastocyst                           | 3,20               | 8,76E-08   | C3H                        |
| Zfp462             | zinc finger protein 462                                    | 3,19               | 2,66E-06   | C57BL/10                   |
| Mtmt7              | myotubularin related protein 7                             | 3,17               | 7,03E-12   | C57BL/10                   |
| Zfp939             | zinc finger protein 939                                    | 3,15               | 5,70E-10   | C57BL/10                   |
| Ccdc109b           | coiled-coil domain containing 109B                         | 3,13               | 6,19E-09   | C57BL/10                   |
| Defb37             | defensin beta 37                                           | 3,13               | 1,86E-03   | C57BL/10                   |
| Rps3               | ribosomal protein S3                                       | 3,10               | 2,71E-10   | C57BL/10                   |
| Hoxb6              | homeobox B6                                                | 3,10               | 3,74E-02   | C57BL/10                   |
| Alpi               | alkaline phosphatase, intestinal                           | 3,09               | 6,69E-03   | C3H                        |
| 1700011H14Rik      | RIKEN cDNA 1700011H14 gene                                 | 3,08               | 2,85E-04   | C57BL/10                   |
| Airn               | antisense Igf2r RNA                                        | 2,98               | 7,52E-07   | C57BL/10                   |
| Crim1              | cysteine rich transmembrane BMP regulator 1 (chordin like) | 2,98               | 6,90E-11   | C57BL/10                   |
| Ermmap             | erythroblast membrane-associated protein                   | 2,97               | 3,57E-03   | C57BL/10                   |
| Comt               | catechol-O-methyltransferase                               | 2,95               | 7,44E-12   | C3H                        |
| Fkbp1b             | FK506 binding protein 1b                                   | 2,94               | 2,00E-06   | C3H                        |
| 4833420G17Rik      | RIKEN cDNA 4833420G17 gene                                 | 2,93               | 5,84E-09   | C57BL/10                   |
| Apol6              | apolipoprotein L 6                                         | 2,90               | 2,19E-06   | C3H                        |
| Lyz2               | lysozyme 2                                                 | 2,87               | 1,10E-05   | C3H                        |
| Dcaf17             | DDB1 and CUL4 associated factor 17                         | 2,86               | 2,94E-09   | C57BL/10                   |
| Tor3a              | torsin family 3, member A                                  | 2,86               | 3,78E-10   | C3H                        |
| Ptprf              | protein tyrosine phosphatase, receptor type, F             | 2,85               | 1,20E-10   | C3H                        |
| Ddx60              | DEAD (Asp-Glu-Ala-Asp) box polypeptide 60                  | 2,80               | 3,11E-06   | C3H                        |
| Cyp2f2             | cytochrome P450, family 2, subfamily f, polypeptide 2      | 2,79               | 2,35E-02   | C3H                        |
| Itih2              | inter-alpha trypsin inhibitor, heavy chain 2               | 2,78               | 4,17E-05   | C3H                        |
| 1500031L02Rik      | RIKEN cDNA 1500031L02 gene                                 | 2,76               | 2,39E-12   | C57BL/10                   |
| Gbp2               | guanylate binding protein 2                                | 2,71               | 3,99E-04   | C3H                        |
| Zfp37              | zinc finger protein 37                                     | 2,70               | 4,68E-05   | C3H                        |
| Rcn1               | reticulocalbin 1                                           | 2,70               | 5,09E-06   | C3H                        |
| Retnlb             | resistin like beta                                         | 2,69               | 2,42E-05   | C3H                        |
| Bckdhb             | branched chain ketoacid dehydrogenase E1, beta polypeptide | 2,69               | 3,47E-10   | C3H                        |
| Rbp2               | retinol binding protein 2, cellular                        | 2,68               | 2,31E-03   | C3H                        |
| Pou2af1            | POU domain, class 2, associating factor 1                  | 2,67               | 5,33E-05   | C3H                        |

**Table S1 (continued): Genes differentially expressed (fold change >2) between C57BL/10 and C3H mice**

| <b>Gene Symbol</b> | <b>Gene Name</b>                                                                            | <b>Fold change</b> | <b>FDR</b> | <b>Higher expressed in</b> |
|--------------------|---------------------------------------------------------------------------------------------|--------------------|------------|----------------------------|
| Ahnak2             | AHNAK nucleoprotein 2                                                                       | 2,67               | 3,67E-05   | C57BL/10                   |
| Hoxb3              | homeobox B3                                                                                 | 2,64               | 3,89E-02   | C57BL/10                   |
| Irgm2              | immunity-related GTPase family M member 2                                                   | 2,62               | 2,37E-06   | C3H                        |
| Sval1              | seminal vesicle antigen-like 1                                                              | 2,62               | 6,87E-03   | C3H                        |
| Abca12             | ATP-binding cassette, sub-family A (ABC1), member 12                                        | 2,61               | 2,81E-02   | C57BL/10                   |
| Zfp386             | zinc finger protein 386 (Kruppel-like)                                                      | 2,61               | 1,15E-09   | C57BL/10                   |
| Prdm16             | PR domain containing 16                                                                     | 2,60               | 1,20E-05   | C57BL/10                   |
| Slc25a29           | solute carrier family 25 (mitochondrial carrier, palmitoylcarnitine transporter), member 29 | 2,59               | 2,62E-11   | C3H                        |
| Fig4               | FIG4 homolog (S. cerevisiae)                                                                | 2,55               | 8,49E-12   | C57BL/10                   |
| Plcd3              | phospholipase C, delta 3                                                                    | 2,55               | 1,87E-06   | C57BL/10                   |
| Crym               | crystallin, mu                                                                              | 2,54               | 7,44E-12   | C3H                        |
| Ppp1r9a            | protein phosphatase 1, regulatory (inhibitor) subunit 9A                                    | 2,53               | 3,14E-07   | C57BL/10                   |
| Rgs13              | regulator of G-protein signaling 13                                                         | 2,53               | 1,78E-04   | C57BL/10                   |
| H2-Q1              | histocompatibility 2, Q region locus 1                                                      | 2,51               | 8,64E-07   | C3H                        |
| Ido1               | indoleamine 2,3-dioxygenase 1                                                               | 2,49               | 2,91E-02   | C3H                        |
| Ikbip              | IKBKB interacting protein                                                                   | 2,47               | 9,79E-08   | C57BL/10                   |
| Ak4                | adenylate kinase 4                                                                          | 2,46               | 1,29E-04   | C57BL/10                   |
| Eif2c4             | eukaryotic translation initiation factor 2C, 4                                              | 2,46               | 8,94E-09   | C57BL/10                   |
| Timp3              | tissue inhibitor of metalloproteinase 3                                                     | 2,45               | 1,41E-03   | C3H                        |
| Guca2b             | guanylate cyclase activator 2b (retina)                                                     | 2,44               | 2,16E-03   | C3H                        |
| Ptk6               | PTK6 protein tyrosine kinase 6                                                              | 2,44               | 1,95E-05   | C3H                        |
| Daam1              | dishevelled associated activator of morphogenesis 1                                         | 2,43               | 6,84E-08   | C3H                        |
| Plcxd2             | phosphatidylinositol-specific phospholipase C, X domain containing 2                        | 2,43               | 6,57E-09   | C57BL/10                   |
| Pyroxd2            | pyridine nucleotide-disulphide oxidoreductase domain 2                                      | 2,42               | 1,07E-07   | C3H                        |
| Ifi2711            | interferon, alpha-inducible protein 27 like 1                                               | 2,41               | 4,33E-08   | C3H                        |
| Plscr4             | phospholipid scramblase 4                                                                   | 2,40               | 4,93E-06   | C3H                        |
| Plbd1              | phospholipase B domain containing 1                                                         | 2,40               | 5,11E-05   | C3H                        |
| Gbp3               | guanylate binding protein 3                                                                 | 2,39               | 1,67E-05   | C3H                        |
| Adh1               | alcohol dehydrogenase 1 (class I)                                                           | 2,39               | 1,32E-03   | C3H                        |
| Mical2             | microtubule associated monooxygenase, calponin and LIM domain containing 2                  | 2,38               | 3,78E-08   | C57BL/10                   |
| E030010A14Rik      | RIKEN cDNA E030010A14 gene                                                                  | 2,36               | 6,13E-04   | C57BL/10                   |
| NA                 | NA                                                                                          | 2,35               | 5,05E-10   | C57BL/10                   |
| Scara5             | scavenger receptor class A, member 5 (putative)                                             | 2,34               | 3,24E-03   | C57BL/10                   |
| Galnt2             | UDP-N-acetyl-alpha-D-galactosamine:polypeptide N-acetylgalactosaminyltransferase 2          | 2,34               | 1,17E-08   | C57BL/10                   |

**Table S1 (continued): Genes differentially expressed (fold change >2) between C57BL/10 and C3H mice**

| <b>Gene Symbol</b> | <b>Gene Name</b>                                                               | <b>Fold change</b> | <b>FDR</b> | <b>Higher expressed in</b> |
|--------------------|--------------------------------------------------------------------------------|--------------------|------------|----------------------------|
| Ift57              | intraflagellar transport 57                                                    | 2,34               | 9,85E-06   | C3H                        |
| Trim30a            | tripartite motif-containing 30A                                                | 2,33               | 3,82E-03   | C3H                        |
| Efnb1              | ephrin B1                                                                      | 2,31               | 9,66E-08   | C57BL/10                   |
| Maob               | monoamine oxidase B                                                            | 2,31               | 1,56E-05   | C3H                        |
| Wfdc2              | WAP four-disulfide core domain 2                                               | 2,30               | 5,55E-03   | C3H                        |
| Trim16             | tripartite motif-containing 16                                                 | 2,29               | 2,84E-07   | C57BL/10                   |
| Fam40b             | family with sequence similarity 40, member B                                   | 2,29               | 1,10E-08   | C57BL/10                   |
| Glo1               | glyoxalase 1                                                                   | 2,28               | 2,48E-13   | C3H                        |
| Arsk               | arylsulfatase K                                                                | 2,28               | 3,78E-11   | C57BL/10                   |
| Nipal1             | NIPA-like domain containing 1                                                  | 2,27               | 2,25E-05   | C3H                        |
| Bcat2              | branched chain aminotransferase 2, mitochondrial                               | 2,26               | 4,46E-08   | C3H                        |
| Spink4             | serine peptidase inhibitor, Kazal type 4                                       | 2,25               | 1,47E-04   | C57BL/10                   |
| Glycam1            | glycosylation dependent cell adhesion molecule 1                               | 2,25               | 3,58E-02   | C3H                        |
| Gadd45g            | growth arrest and DNA-damage-inducible 45 gamma                                | 2,25               | 1,73E-03   | C57BL/10                   |
| Scpep1             | serine carboxypeptidase 1                                                      | 2,25               | 7,80E-10   | C3H                        |
| Qsox1              | quiescin Q6 sulfhydryl oxidase 1                                               | 2,23               | 2,97E-04   | C57BL/10                   |
| Gm12511            | predicted gene 12511                                                           | 2,23               | 1,19E-09   | C57BL/10                   |
| Slc22a29           | solute carrier family 22, member 29                                            | 2,21               | 1,20E-05   | C3H                        |
| Nceh1              | arylacetamide deacetylase-like 1                                               | 2,21               | 3,08E-03   | C57BL/10                   |
| Hck                | hemopoietic cell kinase                                                        | 2,20               | 8,88E-05   | C57BL/10                   |
| Tmem117            | transmembrane protein 117                                                      | 2,20               | 5,86E-08   | C57BL/10                   |
| B130006D01Rik      | RIKEN cDNA B130006D01 gene                                                     | 2,20               | 1,25E-06   | C57BL/10                   |
| Efemp1             | epidermal growth factor-containing fibulin-like extracellular matrix protein 1 | 2,19               | 1,32E-03   | C57BL/10                   |
| Sh2d4a             | SH2 domain containing 4A                                                       | 2,18               | 7,44E-12   | C3H                        |
| Wfdc17             | WAP four-disulfide core domain 17                                              | 2,18               | 2,27E-07   | C57BL/10                   |
| 2310034G01Rik      | RIKEN cDNA 2310034G01 gene                                                     | 2,18               | 1,03E-09   | C3H                        |
| Sord               | sorbitol dehydrogenase                                                         | 2,17               | 2,27E-07   | C57BL/10                   |
| Rps6kb1            | ribosomal protein S6 kinase, polypeptide 1                                     | 2,17               | 3,25E-10   | C57BL/10                   |
| Car8               | carbonic anhydrase 8                                                           | 2,17               | 2,20E-03   | C57BL/10                   |
| Aim1l              | absent in melanoma 1-like                                                      | 2,17               | 2,82E-05   | C57BL/10                   |
| Slc1a5             | solute carrier family 1 (neutral amino acid transporter), member 5             | 2,16               | 4,20E-10   | C57BL/10                   |
| Pfn1               | profilin 1                                                                     | 2,16               | 1,44E-07   | C3H                        |
| Slc38a1            | solute carrier family 38, member 1                                             | 2,15               | 3,78E-11   | C57BL/10                   |
| Irf9               | interferon regulatory factor 9                                                 | 2,15               | 9,79E-10   | C3H                        |

**Table S1 (continued): Genes differentially expressed (fold change >2) between C57BL/10 and C3H mice**

| <b>Gene Symbol</b> | <b>Gene Name</b>                                                                         | <b>Fold change</b> | <b>FDR</b> | <b>Higher expressed in</b> |
|--------------------|------------------------------------------------------------------------------------------|--------------------|------------|----------------------------|
| Gulp1              | GULP, engulfment adaptor PTB domain containing 1                                         | 2,14               | 3,77E-03   | C57BL/10                   |
| Vegfc              | vascular endothelial growth factor C                                                     | 2,14               | 8,82E-06   | C57BL/10                   |
| 2010107G23Rik      | RIKEN cDNA 2010107G23 gene                                                               | 2,13               | 2,90E-12   | C3H                        |
| Rassf4             | Ras association (RalGDS/AF-6) domain family member 4                                     | 2,12               | 1,72E-04   | C57BL/10                   |
| Ifitm3             | interferon induced transmembrane protein 3                                               | 2,11               | 1,41E-04   | C3H                        |
| Ttr                | transthyretin                                                                            | 2,11               | 3,57E-02   | C3H                        |
| Glt25d1            | glycosyltransferase 25 domain containing 1                                               | 2,11               | 6,93E-10   | C57BL/10                   |
| Lgals9             | lectin, galactose binding, soluble 9                                                     | 2,11               | 1,24E-05   | C3H                        |
| Tspan6             | tetraspanin 6                                                                            | 2,10               | 4,64E-04   | C57BL/10                   |
| Dhx58              | DEXH (Asp-Glu-X-His) box polypeptide 58                                                  | 2,10               | 8,29E-05   | C3H                        |
| F3                 | coagulation factor III                                                                   | 2,10               | 4,59E-02   | C3H                        |
| Trmt61b            | tRNA methyltransferase 61 homolog B ( <i>S. cerevisiae</i> )                             | 2,09               | 2,49E-09   | C57BL/10                   |
| Eif4e3             | eukaryotic translation initiation factor 4E member 3                                     | 2,09               | 2,06E-03   | C57BL/10                   |
| Me1                | malic enzyme 1, NADP(+)-dependent, cytosolic                                             | 2,09               | 2,77E-02   | C57BL/10                   |
| Tesk2              | testis-specific kinase 2                                                                 | 2,09               | 1,51E-06   | C3H                        |
| Gas5               | growth arrest specific 5                                                                 | 2,09               | 9,60E-06   | C57BL/10                   |
| Gbp7               | guanylate binding protein 7                                                              | 2,07               | 1,67E-05   | C3H                        |
| Syncn              | syncollin                                                                                | 2,06               | 9,50E-03   | C3H                        |
| Psmb9              | proteasome (prosome, macropain) subunit, beta type 9 (large multifunctional peptidase 2) | 2,06               | 9,49E-08   | C3H                        |
| 2200002K05Rik      | RIKEN cDNA 2200002K05 gene                                                               | 2,06               | 2,43E-04   | C57BL/10                   |
| Car12              | carbonic anhydrase 12                                                                    | 2,06               | 7,68E-03   | C57BL/10                   |
| Flywch2            | FLYWCH family member 2                                                                   | 2,05               | 1,66E-05   | C57BL/10                   |
| Ocel1              | occludin/ELL domain containing 1                                                         | 2,05               | 1,55E-11   | C3H                        |
| Pyy                | peptide YY                                                                               | 2,05               | 1,96E-04   | C3H                        |
| Ly6a               | lymphocyte antigen 6 complex, locus A                                                    | 2,05               | 1,02E-02   | C57BL/10                   |
| Acacb              | acetyl-Coenzyme A carboxylase beta                                                       | 2,04               | 2,16E-04   | C57BL/10                   |
| Exd1               | exonuclease 3'-5' domain containing 1                                                    | 2,04               | 3,98E-11   | C3H                        |
| Mul1               | mitochondrial ubiquitin ligase activator of NFKB 1                                       | 2,04               | 2,75E-08   | C57BL/10                   |
| Smek2              | SMEK homolog 2, suppressor of mek1 ( <i>Dictyostelium</i> )                              | 2,04               | 1,81E-12   | C3H                        |
| Cpn1               | carboxypeptidase N, polypeptide 1                                                        | 2,04               | 5,28E-03   | C57BL/10                   |
| Tm6sf2             | transmembrane 6 superfamily member 2                                                     | 2,04               | 1,97E-03   | C3H                        |
| Fam43a             | family with sequence similarity 43, member A                                             | 2,02               | 1,86E-02   | C57BL/10                   |
| Gadd45gip1         | growth arrest and DNA-damage-inducible, gamma interacting protein 1                      | 2,02               | 1,32E-08   | C57BL/10                   |
| Thbs1              | thrombospondin 1                                                                         | 2,02               | 3,19E-04   | C3H                        |

**Table S1 (continued): Genes differentially expressed (fold change >2) between C57BL/10 and C3H mice**

| <b>Gene Symbol</b> | <b>Gene Name</b>                                 | <b>Fold change</b> | <b>FDR</b> | <b>Higher expressed in</b> |
|--------------------|--------------------------------------------------|--------------------|------------|----------------------------|
| Npc1               | Niemann Pick type C1                             | 2,02               | 4,63E-05   | C57BL/10                   |
| Shoc2              | soc-2 (suppressor of clear) homolog (C. elegans) | 2,01               | 3,78E-10   | C3H                        |
| Zmym6              | zinc finger, MYM-type 6                          | 2,01               | 2,85E-08   | C57BL/10                   |
| Hsd17b13           | hydroxysteroid (17-beta) dehydrogenase 13        | 2,01               | 2,76E-02   | C57BL/10                   |
| Ly96               | lymphocyte antigen 96                            | 2,01               | 5,73E-07   | C57BL/10                   |
| Afap1              | actin filament associated protein 1              | 2,01               | 2,85E-05   | C3H                        |
