# Supplementary material for: Differences in Mucosal Gene Expression in the Colon of Two Inbred Mouse Strains after Colonization with Commensal Gut Bacteria
Source: PubMed Central journal article supplement (PMC3739790; doi:10.1371/journal.pone.0072317), 2013-08-09
Supplement: pone.0072317.s003.pdf [file pone.0072317.s003.pdf]

**Table S3: DAVID functional gene list: signaling/secretion**

| <b>Gene Symbol</b> | <b>Gene Name</b>                                                                                      | <b>Fold change</b> | <b>FDR</b> | <b>Higher expressed in</b> |
|--------------------|-------------------------------------------------------------------------------------------------------|--------------------|------------|----------------------------|
| Pla2g2a            | phospholipase A2, group IIA (platelets, synovial fluid)                                               | 70,80              | 1,62E-17   | C3H                        |
| Ang4               | angiogenin, ribonuclease A family, member 4                                                           | 33,06              | 2,23E-07   | C57BL/10                   |
| Slpi               | secretory leukocyte peptidase inhibitor                                                               | 28,44              | 5,23E-14   | C3H                        |
| Qpct               | glutaminyl-peptide cyclotransferase (glutaminyl cyclase)                                              | 18,57              | 1,04E-18   | C3H                        |
| Pnliprp2           | pancreatic lipase-related protein 2                                                                   | 15,17              | 2,19E-08   | C57BL/10                   |
| Ppy                | pancreatic polypeptide                                                                                | 10,39              | 8,83E-11   | C3H                        |
| Apoc2              | apolipoprotein C-II                                                                                   | 8,96               | 1,97E-11   | C3H                        |
| Mep1a              | mepirin 1 alpha                                                                                       | 7,77               | 8,16E-13   | C57BL/10                   |
| Afm                | afamin                                                                                                | 6,47               | 2,07E-15   | C3H                        |
| Ly6g6c             | lymphocyte antigen 6 complex, locus G6C                                                               | 5,46               | 2,71E-07   | C3H                        |
| Tff2               | trefoil factor 2 (spasmolytic protein 1)                                                              | 5,45               | 1,24E-04   | C3H                        |
| Amn                | amniotless                                                                                            | 5,44               | 4,76E-09   | C3H                        |
| P2ry6              | pyrimidinergic receptor P2Y, G-protein coupled, 6                                                     | 5,27               | 1,54E-12   | C57BL/10                   |
| Tmem87a            | transmembrane protein 87A                                                                             | 4,69               | 4,64E-15   | C3H                        |
| 1810030J14Rik      | RIKEN cDNA 1810030J14 gene                                                                            | 4,66               | 7,66E-04   | C57BL/10                   |
| Tlr1               | toll-like receptor 1                                                                                  | 4,34               | 8,16E-13   | C57BL/10                   |
| Itln1              | intelectin 1 (galactofuranose binding)                                                                | 4,27               | 2,63E-02   | C57BL/10                   |
| Cd14               | CD14 antigen                                                                                          | 4,17               | 1,11E-10   | C3H                        |
| Ly6g               | lymphocyte antigen 6 complex, locus G                                                                 | 4,11               | 4,30E-03   | C3H                        |
| Tns4               | tensin 4                                                                                              | 3,95               | 2,68E-08   | C57BL/10                   |
| Clps               | colipase, pancreatic                                                                                  | 3,79               | 2,07E-06   | C57BL/10                   |
| Cd74               | CD74 antigen (invariant polypeptide of major histocompatibility complex, class II antigen-associated) | 3,61               | 2,27E-07   | C3H                        |
| Col8a1             | collagen, type VIII, alpha 1                                                                          | 3,46               | 5,90E-04   | C3H                        |
| Insl5              | insulin-like 5                                                                                        | 3,44               | 1,74E-03   | C3H                        |
| H2-BI              | histocompatibility 2, blastocyst                                                                      | 3,20               | 8,76E-08   | C3H                        |
| Defb37             | defensin beta 37                                                                                      | 3,13               | 1,86E-03   | C57BL/10                   |
| Crim1              | cysteine rich transmembrane BMP regulator 1 (chordin like)                                            | 2,98               | 6,90E-11   | C57BL/10                   |
| Ermap              | erythroblast membrane-associated protein                                                              | 2,97               | 3,57E-03   | C57BL/10                   |
| Apol6              | apolipoprotein L 6                                                                                    | 2,90               | 2,19E-06   | C3H                        |
| Lyz2               | lysozyme 2                                                                                            | 2,87               | 1,10E-05   | C3H                        |
| Tor3a              | torsin family 3, member A                                                                             | 2,86               | 3,78E-10   | C3H                        |
| Ptprf              | protein tyrosine phosphatase, receptor type, F                                                        | 2,85               | 1,20E-10   | C3H                        |
| Itih2              | inter-alpha trypsin inhibitor, heavy chain 2                                                          | 2,78               | 4,17E-05   | C3H                        |
| Rcn1               | reticulocalbin 1                                                                                      | 2,70               | 5,09E-06   | C3H                        |

**Table S2: DAVID functional gene list: signaling/secretion**

| <b>Gene Symbol</b> | <b>Gene Name</b>                                                                   | <b>Fold change</b> | <b>FDR</b> | <b>Higher expressed in</b> |
|--------------------|------------------------------------------------------------------------------------|--------------------|------------|----------------------------|
| Retnlb             | resistin like beta                                                                 | 2,69               | 2,42E-05   | C3H                        |
| Sval1              | seminal vesicle antigen-like 1                                                     | 2,62               | 6,87E-03   | C3H                        |
| H2-Q1              | histocompatibility 2, Q region locus 1                                             | 2,51               | 8,64E-07   | C3H                        |
| Timp3              | tissue inhibitor of metalloproteinase 3                                            | 2,45               | 1,41E-03   | C3H                        |
| Guca2b             | guanylate cyclase activator 2b (retina)                                            | 2,44               | 2,16E-03   | C3H                        |
| Plbd1              | phospholipase B domain containing 1                                                | 2,40               | 5,11E-05   | C3H                        |
| Scara5             | scavenger receptor class A, member 5 (putative)                                    | 2,34               | 3,24E-03   | C57BL/10                   |
| Galnt2             | UDP-N-acetyl-alpha-D-galactosamine:polypeptide N-acetylgalactosaminyltransferase 2 | 2,34               | 1,17E-08   | C57BL/10                   |
| Efnb1              | ephrin B1                                                                          | 2,31               | 9,66E-08   | C57BL/10                   |
| Wfdc2              | WAP four-disulfide core domain 2                                                   | 2,30               | 5,55E-03   | C3H                        |
| Arsk               | arylsulfatase K                                                                    | 2,28               | 3,78E-11   | C57BL/10                   |
| Spink4             | serine peptidase inhibitor, Kazal type 4                                           | 2,25               | 1,47E-04   | C57BL/10                   |
| Glycam1            | glycosylation dependent cell adhesion molecule 1                                   | 2,25               | 3,58E-02   | C3H                        |
| Scpep1             | serine carboxypeptidase 1                                                          | 2,25               | 7,80E-10   | C3H                        |
| Qsox1              | quiescin Q6 sulfhydryl oxidase 1                                                   | 2,23               | 2,97E-04   | C57BL/10                   |
| Efemp1             | epidermal growth factor-containing fibulin-like extracellular matrix protein 1     | 2,19               | 1,32E-03   | C57BL/10                   |
| Pfn1               | profilin 1                                                                         | 2,16               | 1,44E-07   | C3H                        |
| Vegfc              | vascular endothelial growth factor C                                               | 2,14               | 8,82E-06   | C57BL/10                   |
| Ttr                | transthyretin                                                                      | 2,11               | 3,57E-02   | C3H                        |
| Glt25d1            | glycosyltransferase 25 domain containing 1                                         | 2,11               | 6,93E-10   | C57BL/10                   |
| Lgals9             | lectin, galactose binding, soluble 9                                               | 2,11               | 1,24E-05   | C3H                        |
| F3                 | coagulation factor III                                                             | 2,10               | 4,59E-02   | C3H                        |
| Sycn               | syncollin                                                                          | 2,06               | 9,50E-03   | C3H                        |
| 2200002K05Rik      | RIKEN cDNA 2200002K05 gene                                                         | 2,06               | 2,43E-04   | C57BL/10                   |
| Car12              | carbonic anhydrase 12                                                              | 2,06               | 7,68E-03   | C57BL/10                   |
| Pyy                | peptide YY                                                                         | 2,05               | 1,96E-04   | C3H                        |
| Ly6a               | lymphocyte antigen 6 complex, locus A                                              | 2,05               | 1,02E-02   | C57BL/10                   |
| Cpn1               | carboxypeptidase N, polypeptide 1                                                  | 2,04               | 5,28E-03   | C57BL/10                   |
| Thbs1              | thrombospondin 1                                                                   | 2,02               | 3,19E-04   | C3H                        |
| Npc1               | Niemann Pick type C1                                                               | 2,02               | 4,63E-05   | C57BL/10                   |
| Hsd17b13           | hydroxysteroid (17-beta) dehydrogenase 13                                          | 2,01               | 2,76E-02   | C57BL/10                   |
| Ly96               | lymphocyte antigen 96                                                              | 2,01               | 5,73E-07   | C57BL/10                   |
