# Supplementary material for: Differences in Mucosal Gene Expression in the Colon of Two Inbred Mouse Strains after Colonization with Commensal Gut Bacteria
Source: PubMed Central journal article supplement (PMC3739790; doi:10.1371/journal.pone.0072317), 2013-08-09
Supplement: pone.0072317.s004.pdf [file pone.0072317.s004.pdf]

**Table S4: DAVID functional gene list: peptidase inhibition**

| <b>Gene Symbol</b> | <b>Gene Name</b>                                           | <b>Fold change</b> | <b>FDR</b> | <b>Higher expressed in</b> |
|--------------------|------------------------------------------------------------|--------------------|------------|----------------------------|
| Slpi               | secretory leukocyte peptidase inhibitor                    | 28,44              | 5,23E-14   | C3H                        |
| Crim1              | cysteine rich transmembrane BMP regulator 1 (chordin like) | 2,98               | 6,90E-11   | C57BL/10                   |
| Itih2              | inter-alpha trypsin inhibitor, heavy chain 2               | 2,78               | 4,17E-05   | C3H                        |
| Timp3              | tissue inhibitor of metalloproteinase 3                    | 2,45               | 1,41E-03   | C3H                        |
| Wfdc2              | WAP four-disulfide core domain 2                           | 2,30               | 5,55E-03   | C3H                        |
| Spink4             | serine peptidase inhibitor, Kazal type 4                   | 2,25               | 1,47E-04   | C57BL/10                   |
| Wfdc17             | WAP four-disulfide core domain 17                          | 2,18               | 2,27E-07   | C57BL/10                   |
