# Supplementary material for: Differences in Mucosal Gene Expression in the Colon of Two Inbred Mouse Strains after Colonization with Commensal Gut Bacteria
Source: PubMed Central journal article supplement (PMC3739790; doi:10.1371/journal.pone.0072317), 2013-08-09
Supplement: pone.0072317.s005.pdf [file pone.0072317.s005.pdf]

**Table S5: DAVID functional gene list: Guanine binding**

| <b>Gene Symbol</b> | <b>Gene Name</b>                          | <b>Fold change</b> | <b>FDR</b> | <b>Higher expressed in</b> |
|--------------------|-------------------------------------------|--------------------|------------|----------------------------|
| Gbp1               | guanylate binding protein 1               | 18,38              | 4,77E-16   | C3H                        |
| Gbp2               | guanylate binding protein 2               | 2,71               | 3,99E-04   | C3H                        |
| Irgm2              | immunity-related GTPase family M member 2 | 2,62               | 2,37E-06   | C3H                        |
| Ak4                | adenylate kinase 4                        | 2,46               | 1,29E-04   | C57BL/10                   |
| Gbp3               | guanylate binding protein 3               | 2,39               | 1,67E-05   | C3H                        |
| Gbp7               | guanylate binding protein 7               | 2,07               | 1,67E-05   | C3H                        |
