# Supplementary material for: Differences in Mucosal Gene Expression in the Colon of Two Inbred Mouse Strains after Colonization with Commensal Gut Bacteria
Source: PubMed Central journal article supplement (PMC3739790; doi:10.1371/journal.pone.0072317), 2013-08-09
Supplement: pone.0072317.s006.pdf [file pone.0072317.s006.pdf]

**Table S6: DAVID functional gene list: response to bacteria/defense**

| <b>Gene Symbol</b> | <b>Gene Name</b>                                                                                      | <b>Fold change</b> | <b>FDR</b> | <b>Higher expressed in</b> |
|--------------------|-------------------------------------------------------------------------------------------------------|--------------------|------------|----------------------------|
| Ang4               | angiogenin, ribonuclease A family, member 4                                                           | 33,06              | 2,23E-07   | C57BL/10                   |
| Pnliprp2           | pancreatic lipase-related protein 2                                                                   | 15,17              | 2,19E-08   | C57BL/10                   |
| Tlr1               | toll-like receptor 1                                                                                  | 4,34               | 8,16E-13   | C57BL/10                   |
| Cd74               | CD74 antigen (invariant polypeptide of major histocompatibility complex, class II antigen-associated) | 3,61               | 2,27E-07   | C3H                        |
| Defb37             | defensin beta 37                                                                                      | 3,13               | 1,86E-03   | C57BL/10                   |
| Fkbp1b             | FK506 binding protein 1b                                                                              | 2,94               | 2,00E-06   | C3H                        |
| Lyz2               | lysozyme 2                                                                                            | 2,87               | 1,10E-05   | C3H                        |
| H2-Q1              | histocompatibility 2, Q region locus 1                                                                | 2,51               | 8,64E-07   | C3H                        |
| Ido1               | indoleamine 2,3-dioxygenase 1                                                                         | 2,49               | 2,91E-02   | C3H                        |
| Timp3              | tissue inhibitor of metalloproteinase 3                                                               | 2,45               | 1,41E-03   | C3H                        |
| Adh1               | alcohol dehydrogenase 1 (class I)                                                                     | 2,39               | 1,32E-03   | C3H                        |
| Hck                | hemopoietic cell kinase                                                                               | 2,20               | 8,88E-05   | C57BL/10                   |
| Dhx58              | DEXH (Asp-Glu-X-His) box polypeptide 58                                                               | 2,10               | 8,29E-05   | C3H                        |
| F3                 | coagulation factor III                                                                                | 2,10               | 4,59E-02   | C3H                        |
| Me1                | malic enzyme 1, NADP(+)-dependent, cytosolic                                                          | 2,09               | 2,77E-02   | C57BL/10                   |
| Thbs1              | thrombospondin 1                                                                                      | 2,02               | 3,19E-04   | C3H                        |
| Ly96               | lymphocyte antigen 96                                                                                 | 2,01               | 5,73E-07   | C57BL/10                   |
