# Supplementary material for: Differences in Mucosal Gene Expression in the Colon of Two Inbred Mouse Strains after Colonization with Commensal Gut Bacteria
Source: PubMed Central journal article supplement (PMC3739790; doi:10.1371/journal.pone.0072317), 2013-08-09
Supplement: pone.0072317.s007.pdf [file pone.0072317.s007.pdf]

**Table S7: DAVID functional gene list: hormone activity**

| <b>Gene Symbol</b> | <b>Gene Name</b>                         | <b>Fold change</b> | <b>FDR</b> | <b>Higher expressed in</b> |
|--------------------|------------------------------------------|--------------------|------------|----------------------------|
| Ppy                | pancreatic polypeptide                   | 10,39              | 8,83E-11   | C3H                        |
| Tff2               | trefoil factor 2 (spasmolytic protein 1) | 5,45               | 1,24E-04   | C3H                        |
| Insl5              | insulin-like 5                           | 3,44               | 1,74E-03   | C3H                        |
| Retnlb             | resistin like beta                       | 2,69               | 2,42E-05   | C3H                        |
| Vegfc              | vascular endothelial growth factor C     | 2,14               | 8,82E-06   | C57BL/10                   |
| Ttr                | transthyretin                            | 2,11               | 3,57E-02   | C3H                        |
| Pyy                | peptide YY                               | 2,05               | 1,96E-04   | C3H                        |
