# Supplementary material for: Differences in Mucosal Gene Expression in the Colon of Two Inbred Mouse Strains after Colonization with Commensal Gut Bacteria
Source: PubMed Central journal article supplement (PMC3739790; doi:10.1371/journal.pone.0072317), 2013-08-09
Supplement: pone.0072317.s008.pdf [file pone.0072317.s008.pdf]

**Table S8: DAVID functional gene list: lipoprotein-associated**

| <b>Gene Symbol</b> | <b>Gene Name</b>                                              | <b>Fold change</b> | <b>FDR</b> | <b>Higher expressed in</b> |
|--------------------|---------------------------------------------------------------|--------------------|------------|----------------------------|
| Gbp1               | guanylate binding protein 1                                   | 18,38              | 4,77E-16   | C3H                        |
| Plscr2             | phospholipid scramblase 2                                     | 16,62              | 3,11E-14   | C3H                        |
| Apoc2              | apolipoprotein C-II                                           | 8,96               | 1,97E-11   | C3H                        |
| Mal                | myelin and lymphocyte protein, T cell differentiation protein | 7,13               | 6,05E-07   | C3H                        |
| Ly6g6c             | lymphocyte antigen 6 complex, locus G6C                       | 5,46               | 2,71E-07   | C3H                        |
| Itln1              | intelectin 1 (galactofuranose binding)                        | 4,27               | 2,63E-02   | C57BL/10                   |
| Cd14               | CD14 antigen                                                  | 4,17               | 1,11E-10   | C3H                        |
| Ly6g               | lymphocyte antigen 6 complex, locus G                         | 4,11               | 4,30E-03   | C3H                        |
| Apol6              | apolipoprotein L 6                                            | 2,90               | 2,19E-06   | C3H                        |
| Gbp2               | guanylate binding protein 2                                   | 2,71               | 3,99E-04   | C3H                        |
| Plscr4             | phospholipid scramblase 4                                     | 2,40               | 4,93E-06   | C3H                        |
| Hck                | hemopoietic cell kinase                                       | 2,20               | 8,88E-05   | C57BL/10                   |
| F3                 | coagulation factor III                                        | 2,10               | 4,59E-02   | C3H                        |
| Ly6a               | lymphocyte antigen 6 complex, locus A                         | 2,05               | 1,02E-02   | C57BL/10                   |
